# Supplementary material
Source: publisher site journal article supplement (https://www.dovepress.com/article/473437)
Supplement: Supplementary file 1 [file get_supplementary_file.php]

**Supplementary material**

Contents:

1. NMR and HRMS of target compounds **1**-**32** (Figure S1-S96)

2. IC50 of compounds **30**-**32** on PDHK1 (Figure S97-S99)

3. IC50 of compounds **30**-**32** on PDHK4 (Figure S100-S102)

4. Drug-likeness properties and Predicted ADME/T profiles of compound **32** (Table S1-S2)

**1. NMR and HRMS of target compounds 1-32**

- 1H-NMR-compound **1**

Figure S1. 1H NMR of compound **1**

- 13C-NMR-compound **1**

Figure S2. 13C NMR of compound 1

- HRMS of compound 1


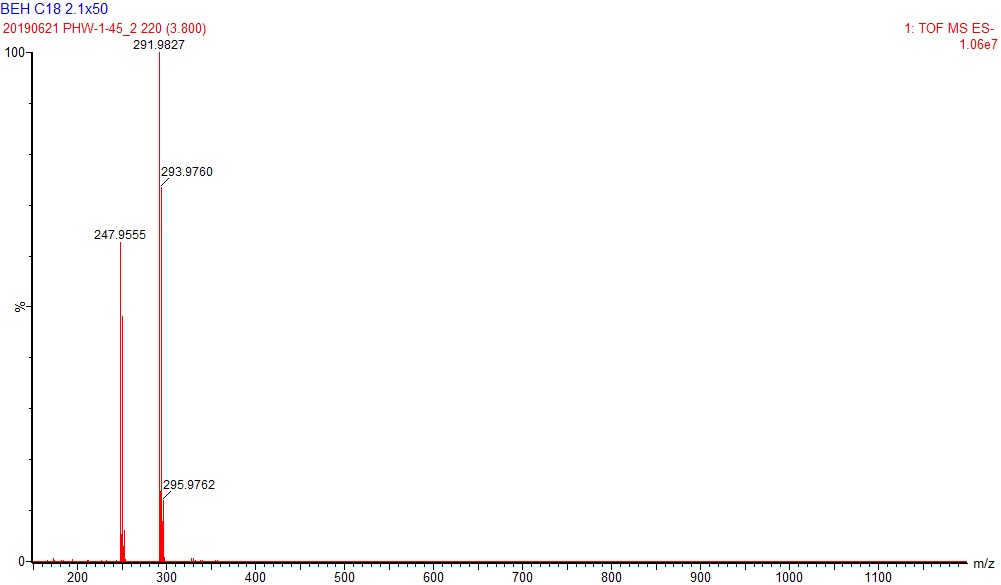


Figure S3.HRMS(ESI) of compound **1**.

- 1H-NMR-compound **2**

Figure S4.1H NMR of compound **2**

- 13C-NMR-compound **2**

Figure S5.13C NMR of compound 2

- HRMS of compound 2


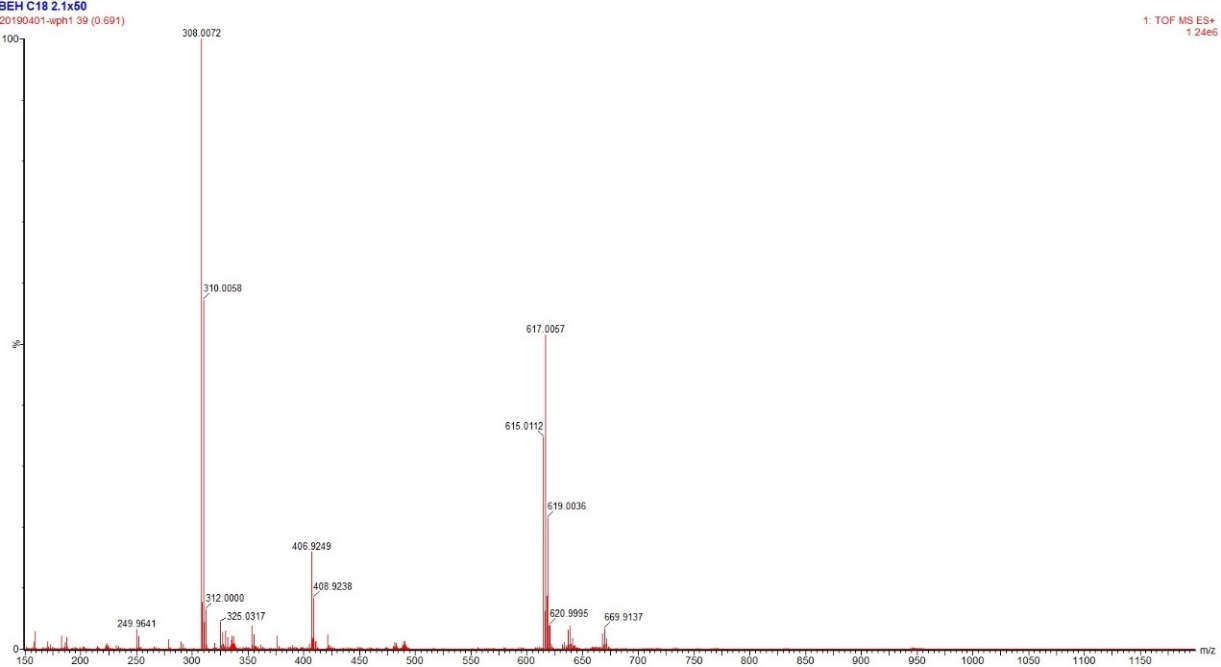


Figure S6. HRMS(ESI) of compound **2**.

- 1H-NMR-compound **3**

Figure S7. 1H NMR of compound **3**

- 13C-NMR-compound **3**

Figure S8. 13C NMR of compound 3

- HRMS of compound 3


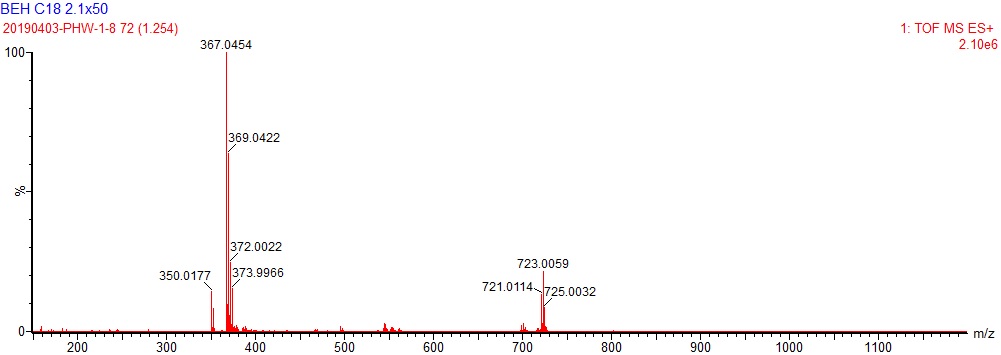


Figure S9. HRMS(ESI) of compound **3**.

- 1H-NMR-compound **4**

Figure S10. 1H NMR of compound **4**

- 13C-NMR-compound **4**

Figure S11. 13C NMR of compound 4

- HRMS of compound 4


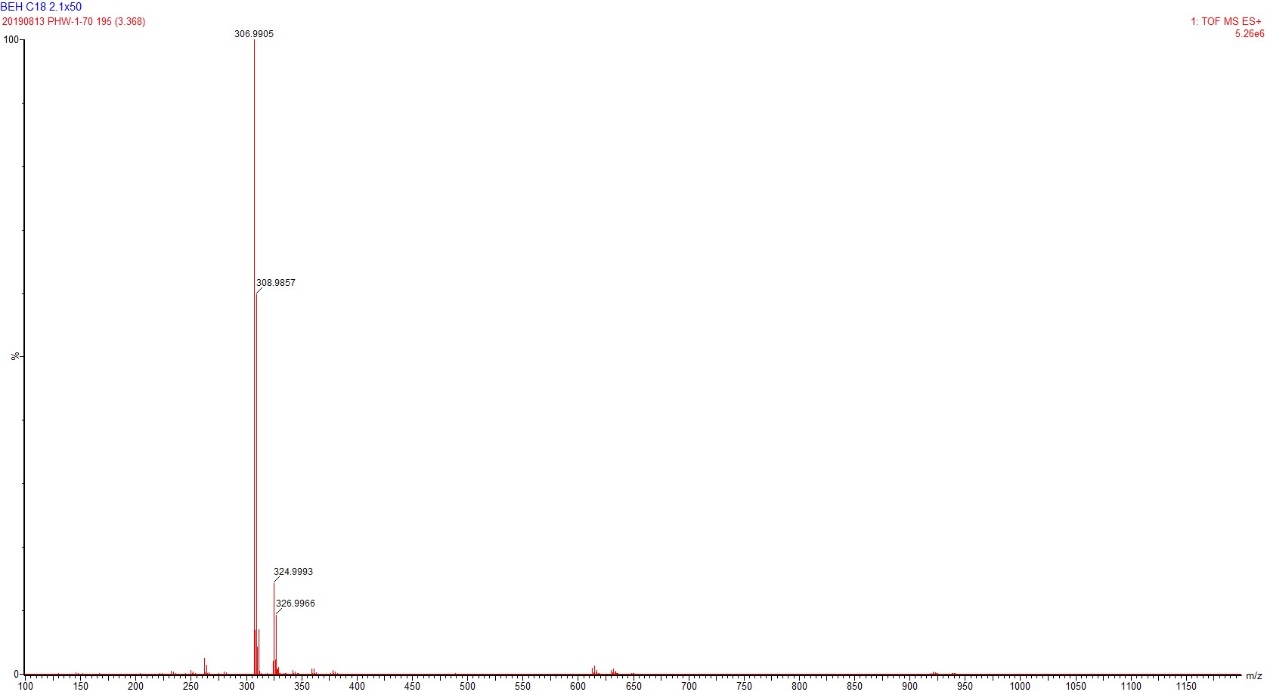


Figure S12. HRMS(ESI) of compound **4**.

- 1H-NMR-compound **5**

Figure S13. 1H NMR of compound **5**

- 13C-NMR-compound **5**

Figure S14. 13C NMR of compound 5

- HRMS of compound 5


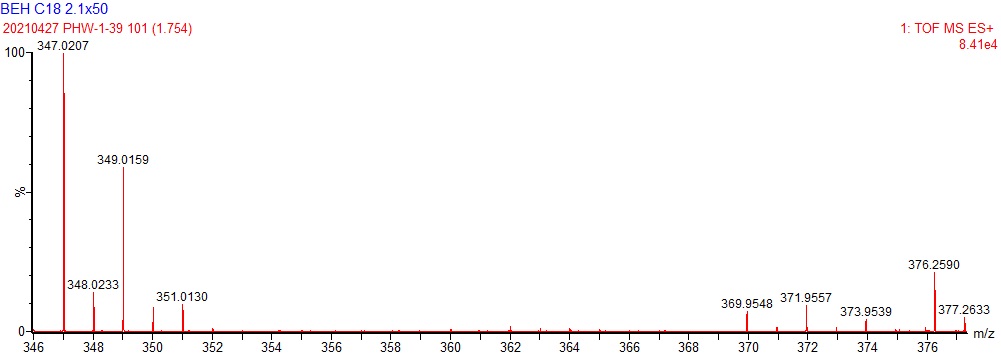


Figure S15. HRMS(ESI) of compound **5**.

- 1H-NMR-compound **6**

Figure S16. 1H NMR of compound **6**

- 13C-NMR-compound **6**

Figure S17. 13C NMR of compound 6

- HRMS of compound 6


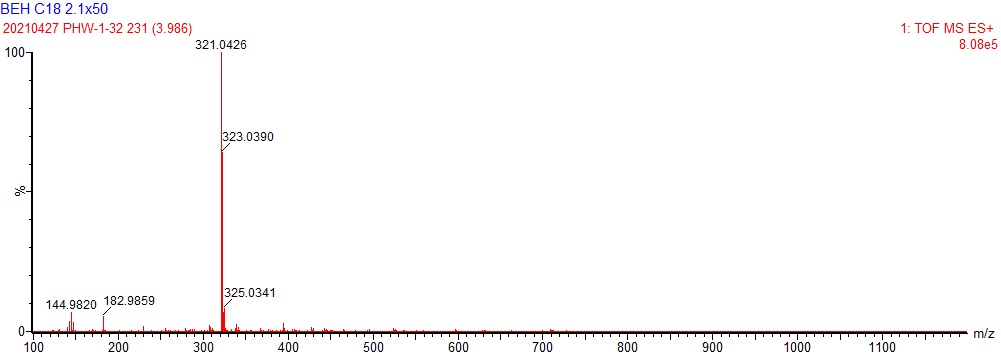


Figure S18. HRMS(ESI) of compound **6**.

- 1H-NMR-compound **7**

Figure S19. 1H NMR of compound **7**

- 13C-NMR-compound **7**

Figure S20. 13C NMR of compound 7

- HRMS of compound 7


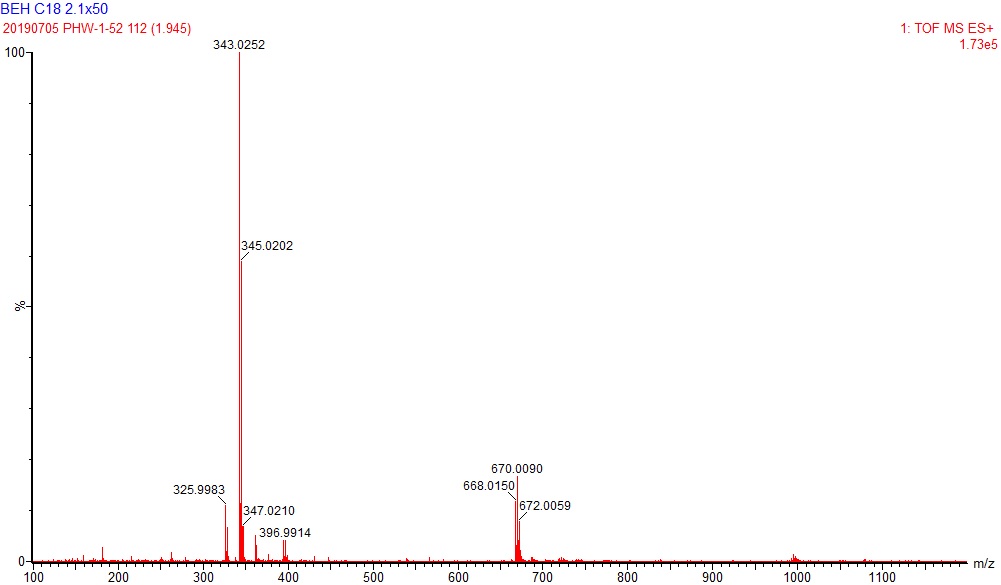


Figure S21. HRMS(ESI) of compound **7**.

- 1H-NMR-compound **8**

Figure S22. 1H NMR of compound **8**

- 13C-NMR-compound **8**

Figure S23. 13C NMR of compound 8

- HRMS of compound 8


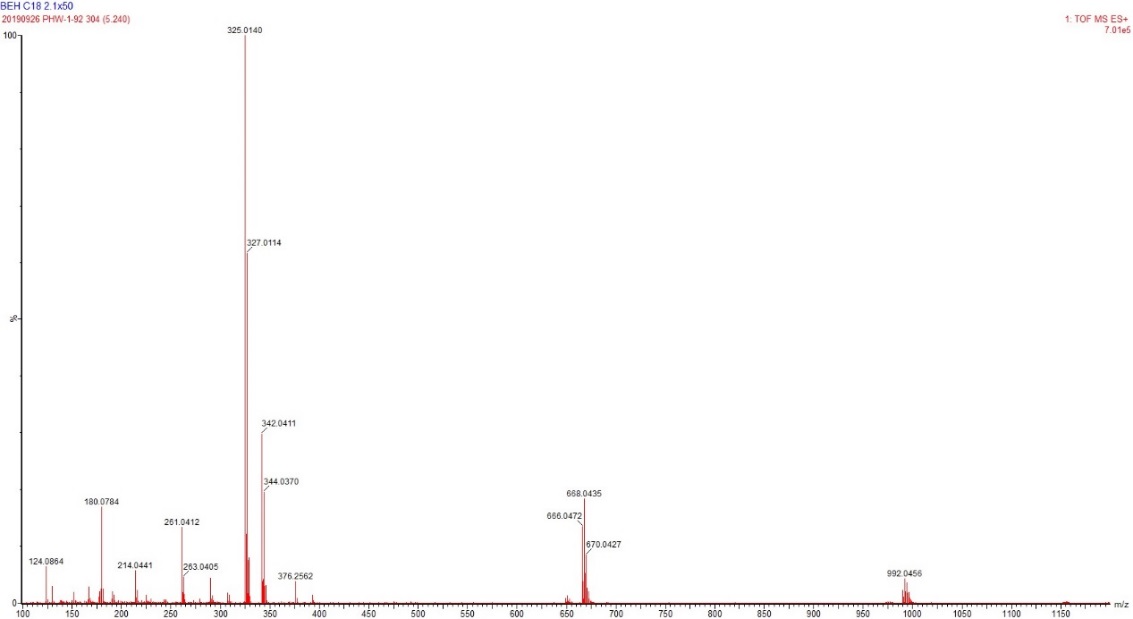


Figure S24. HRMS(ESI) of compound **8**.

- 1H-NMR-compound **9**

Figure S25. 1H NMR of compound **9**

- 13C-NMR-compound **9**

Figure S26. 13C NMR of compound 9

- HRMS of compound 9


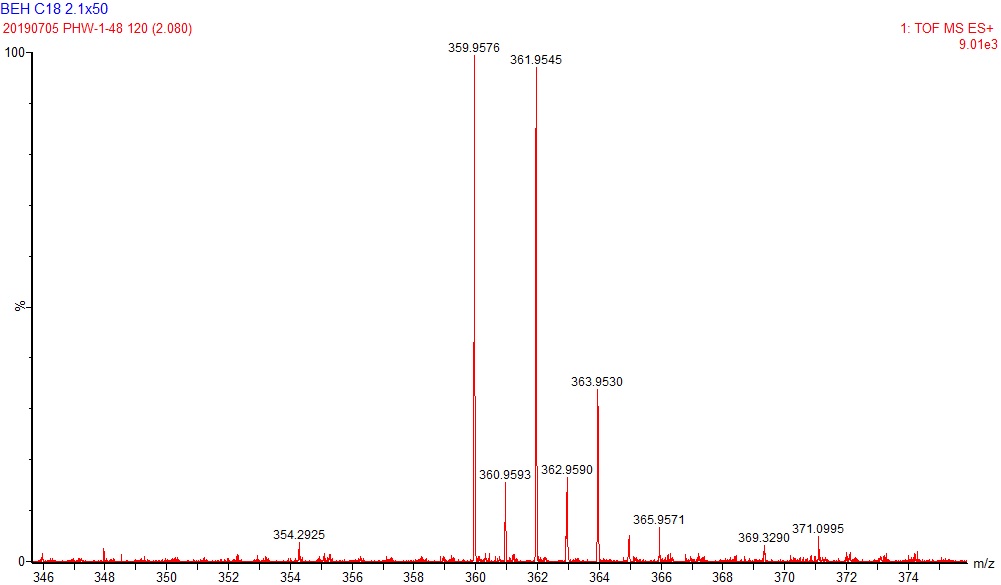


Figure S27. HRMS(ESI) of compound **9**.

- 1H-NMR-compound **10**

Figure S28. 1H NMR of compound **10**

- 13C-NMR-compound **10**

Figure S29. 13C NMR of compound 10

- HRMS of compound 10


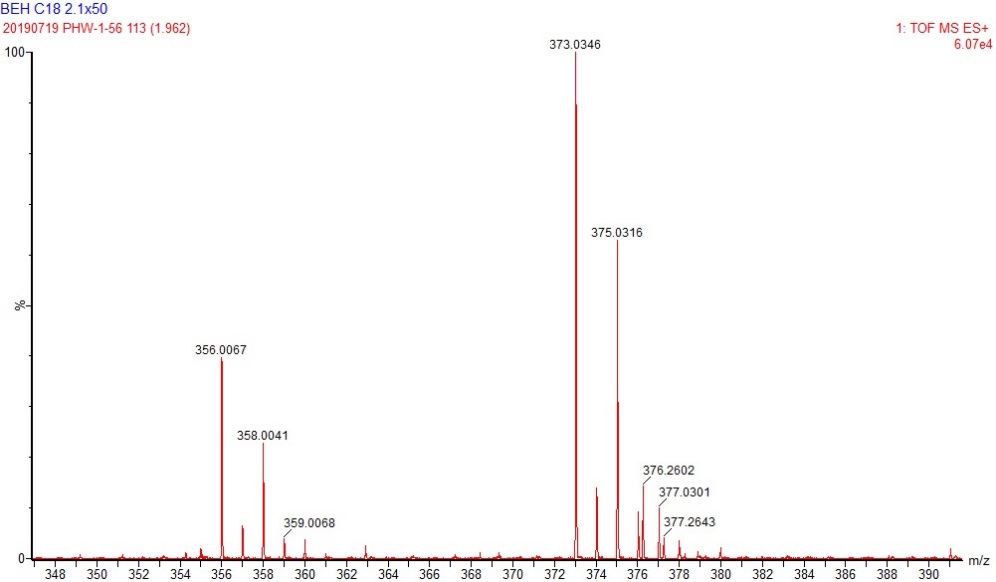


Figure S30. HRMS(ESI) of compound **10**.

- 1H-NMR-compound **11**

Figure S31. 1H NMR of compound **11**

- 13C-NMR-compound **11**

Figure S32. 13C NMR of compound 11

- HRMS of compound 11


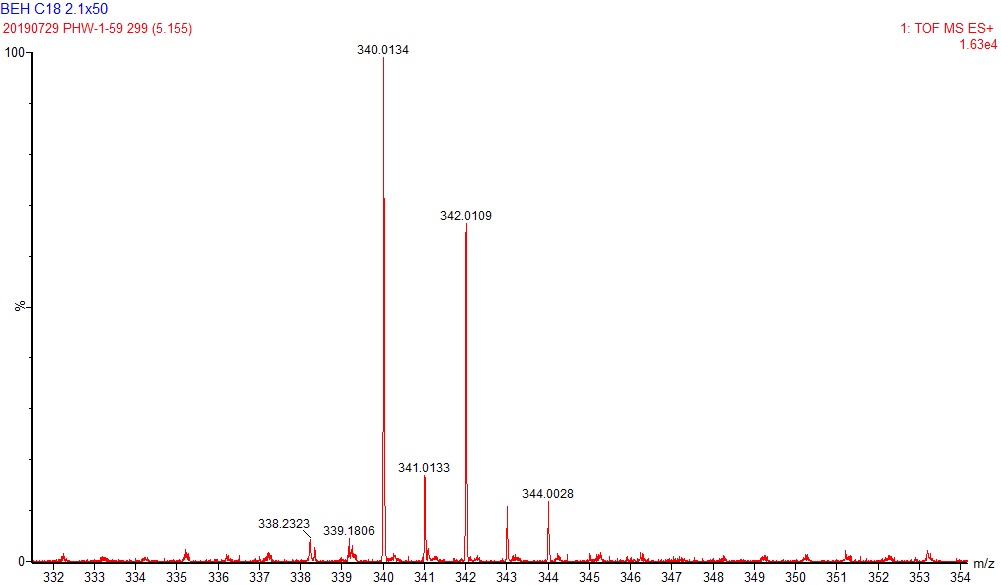


Figure S33. HRMS(ESI) of compound **11**.

- 1H-NMR-compound **12**

Figure S34. 1H NMR of compound **12**

- 13C-NMR-compound **12**

Figure S35. 13C NMR of compound 12

- HRMS of compound 12


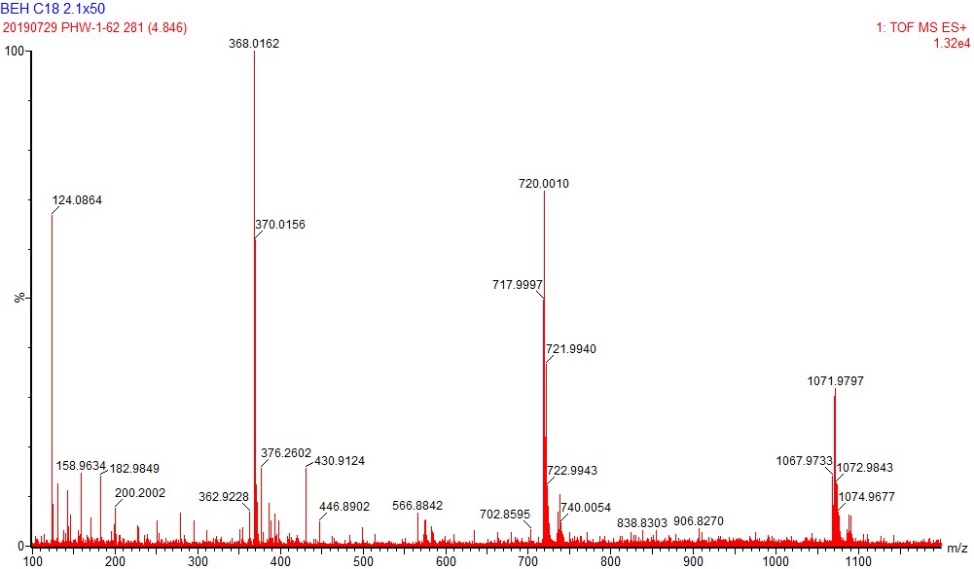


Figure S36. HRMS(ESI) of compound **12**.

- 1H-NMR-compound **13**

Figure S37. 1H NMR of compound **13**

- 13C-NMR-compound **13**

Figure S38. 13C NMR of compound 13

- HRMS of compound 13


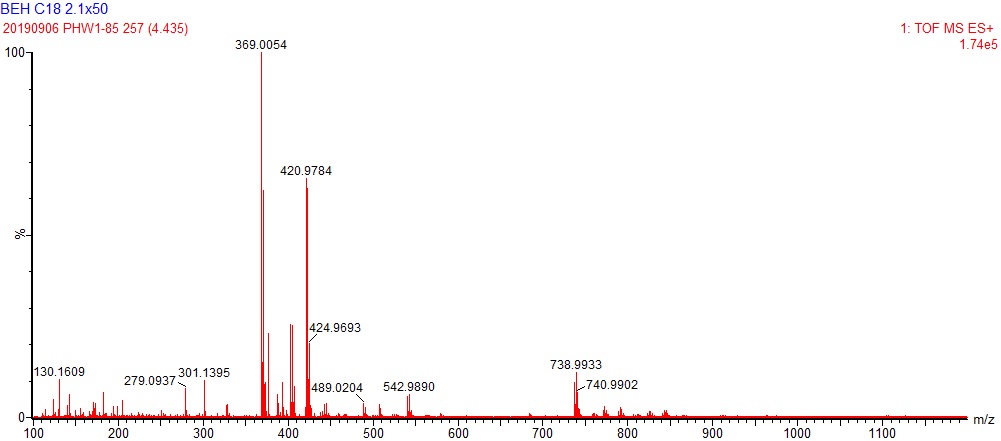


Figure S39. HRMS(ESI) of compound **13**.

- 1H-NMR-compound **14**

Figure S40. 1H NMR of compound **14**

- 13C-NMR-compound **14**

Figure S41. 13C NMR of compound 14

- HRMS of compound 14


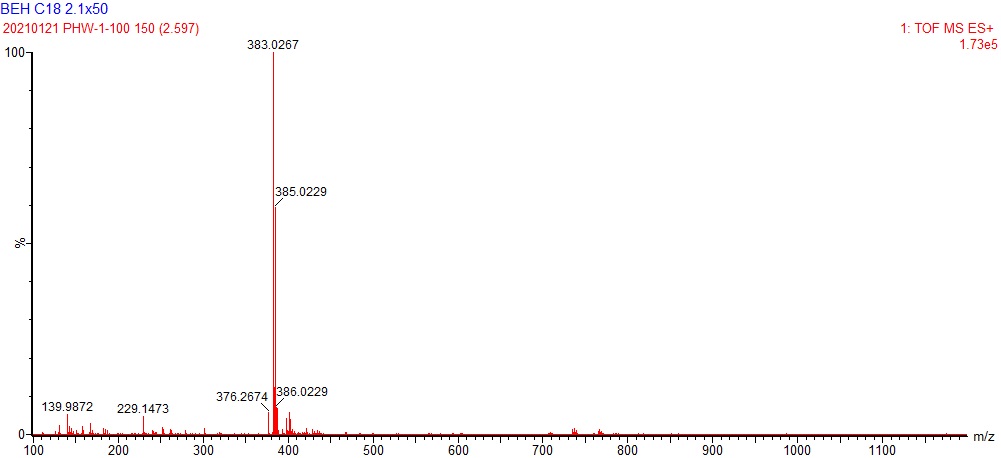


Figure S42. HRMS(ESI) of compound **14**.

- 1H-NMR-compound **15**

Figure S43. 1H NMR of compound **15**

- 13C-NMR-compound **15**

Figure S44. 13C NMR of compound 15

- HRMS of compound 15


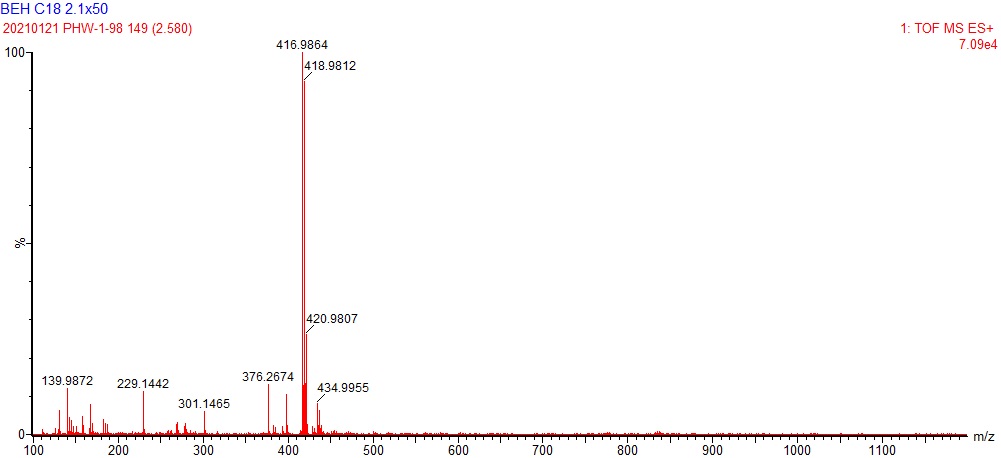


Figure S45. HRMS(ESI) of compound **15**.

- 1H-NMR-compound **16**

Figure S46. 1H NMR of compound **16**

- 13C-NMR-compound **16**

Figure S47. 13C NMR of compound 16

- HRMS of compound 16


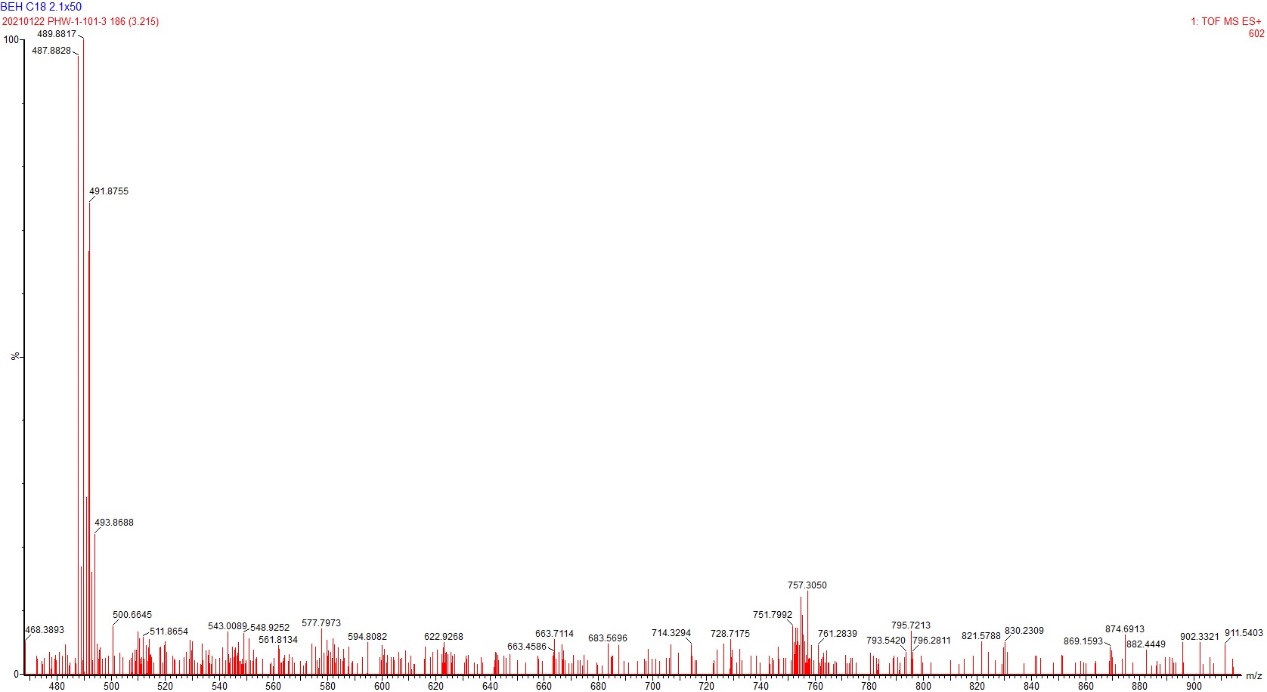


Figure S48. HRMS(ESI) of compound **16**.

- 1H-NMR-compound **17**

Figure S49. 1H NMR of compound **17**

- 13C-NMR-compound **17**

Figure S50. 13C NMR of compound 17

- HRMS of compound 17


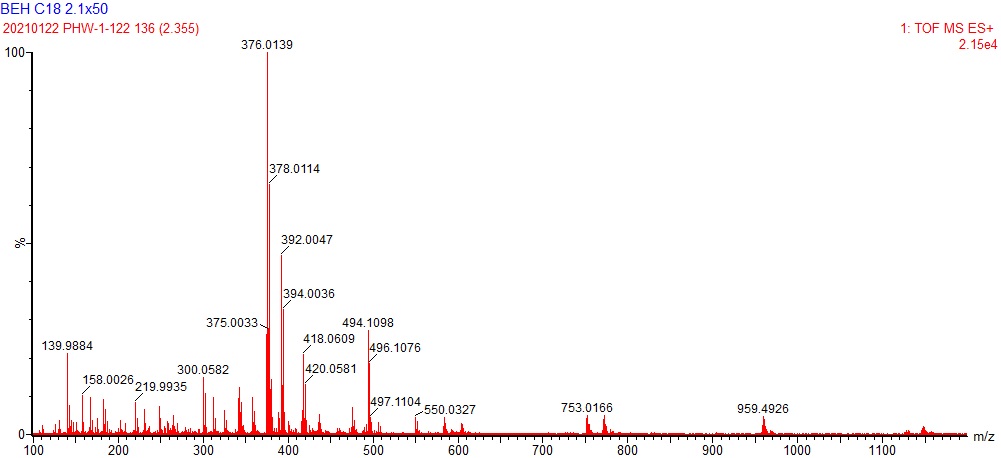


Figure S51. HRMS(ESI) of compound **17**.

- 1H-NMR-compound **18**

Figure S52. 1H NMR of compound **18**

- 13C-NMR-compound **18**

Figure S53. 13C NMR of compound 18

- HRMS of compound 18


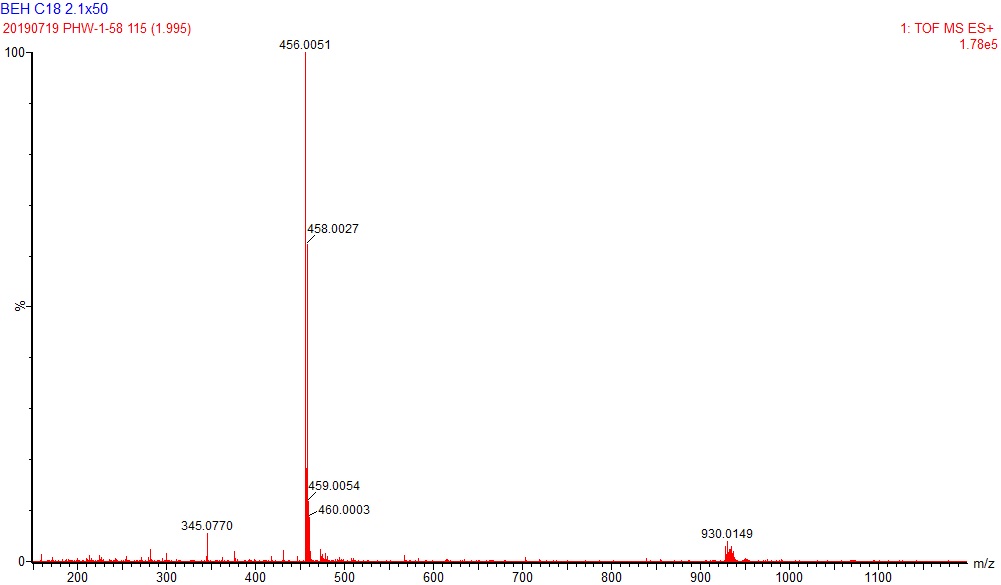
Figure S54. HRMS(ESI) of compound **18**.

- 1H-NMR-compound **19**

Figure S55. 1H NMR of compound **19**

- 13C-NMR-compound **19**

Figure S56. 13C NMR of compound 19

- HRMS of compound 19


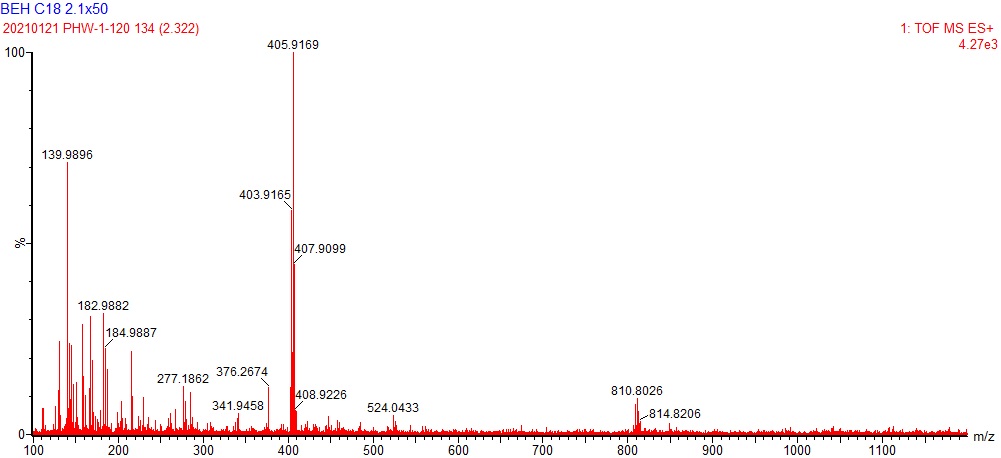


Figure S57. HRMS(ESI) of compound **19**.

- 1H-NMR-compound **20**

Figure S58. 1H NMR of compound **20**

- 13C-NMR-compound **20**

Figure S59. 13C NMR of compound 20

- HRMS of compound 20


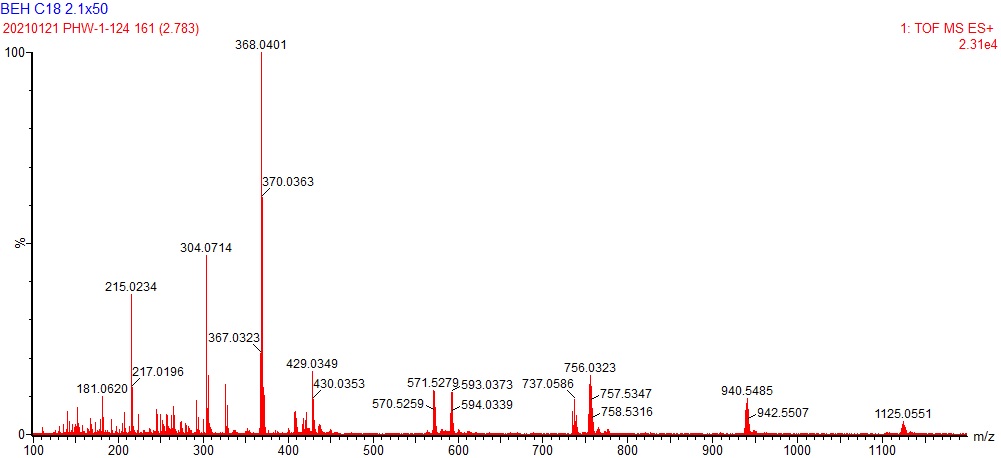


Figure S60. HRMS(ESI) of compound **20**.

- 1H-NMR-compound **21**

Figure S61. 1H NMR of compound **21**

- 13C-NMR-compound **21**

Figure S62. 13C NMR of compound 21

- HRMS of compound **2**1


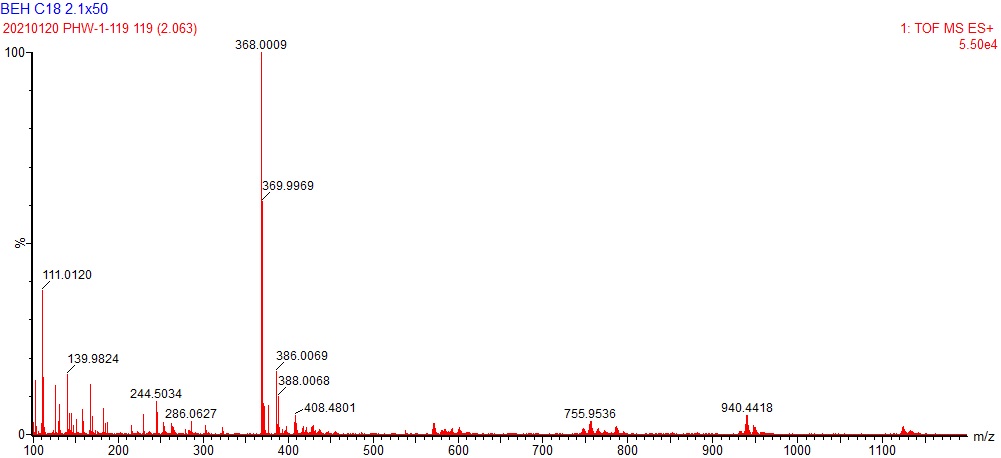


Figure S63. HRMS(ESI) of compound **21**.

- 1H-NMR-compound **22**

Figure S64. 1H NMR of compound **22**

- 13C-NMR-compound **22**

Figure S65. 13C NMR of compound 22

- HRMS of compound 22


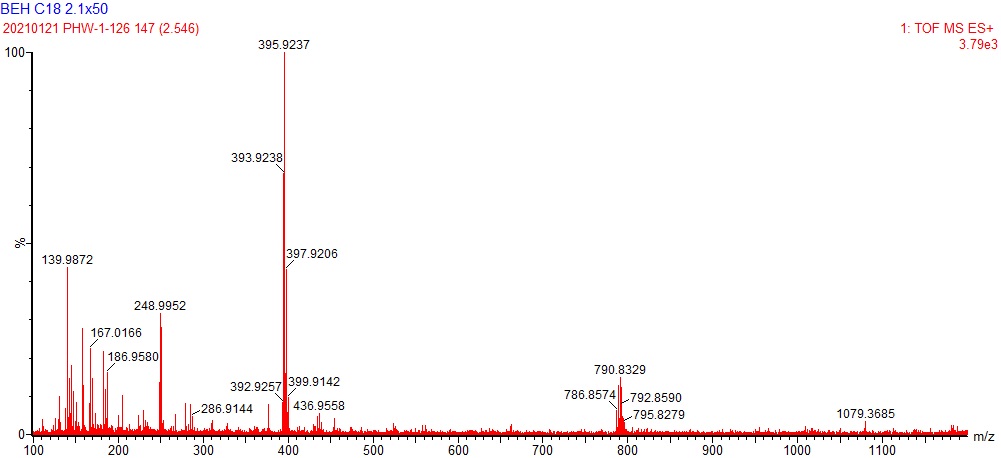
Figure S66. HRMS(ESI) of compound **22**.

- 1H-NMR-compound **23**

Figure S67. 1H NMR of compound **23**

- 13C-NMR-compound **23**

Figure S68. 13C NMR of compound 23

- HRMS of compound 23


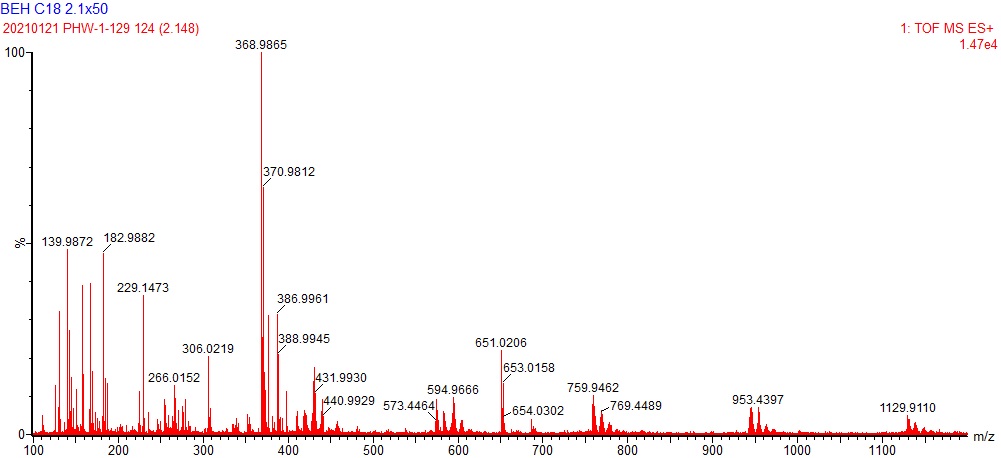


Figure S69. HRMS(ESI) of compound **23**.

- 1H-NMR-compound **24**

Figure S70. 1H NMR of compound **24**

- 13C-NMR-compound **24**

Figure S71. 13C NMR of compound 24

- HRMS of compound 24


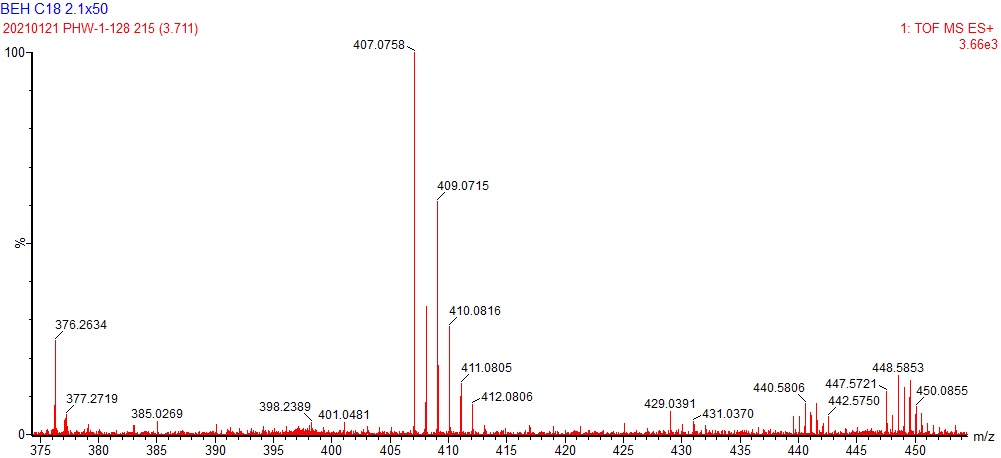


Figure S72. HRMS(ESI) of compound **24**.

- 1H-NMR-compound **25**

Figure S73. 1H NMR of compound **25**

- 13C-NMR-compound **25**

Figure S74. 13C NMR of compound 25

- HRMS of compound 25


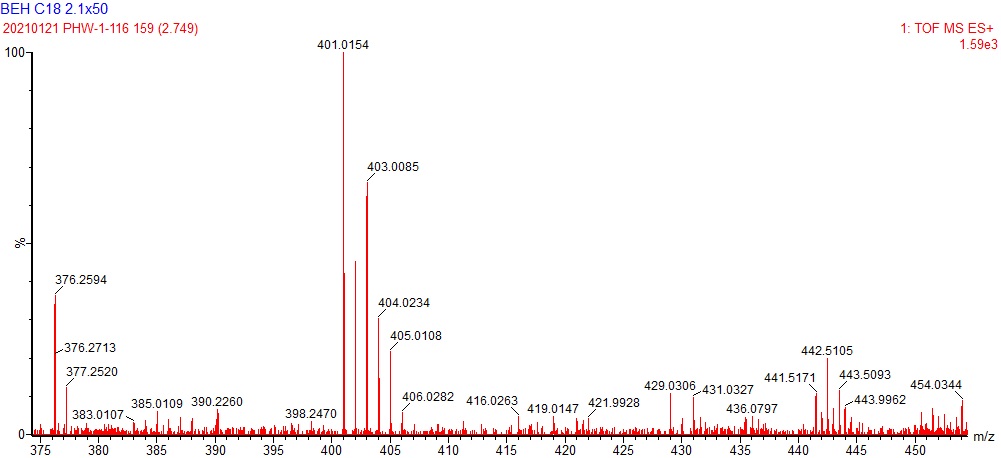


Figure S75. HRMS(ESI) of compound **25**.

- 1H-NMR-compound **26**

Figure S76. 1H NMR of compound **26**

- 13C-NMR-compound **26**

Figure S77. 13C NMR of compound 26

- HRMS of compound 26


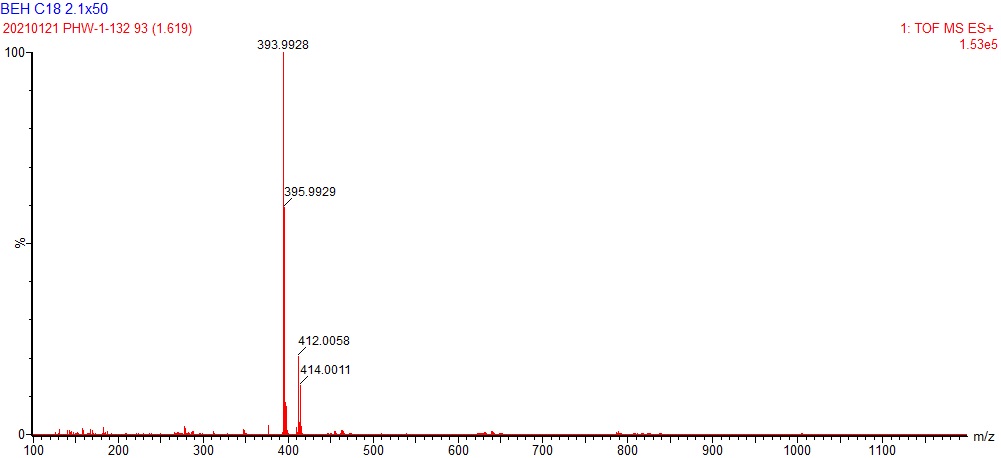


Figure S78. HRMS(ESI) of compound **26**.

- 1H-NMR-compound **27**

Figure S79. 1H NMR of compound **27**

- 13C-NMR-compound **27**

Figure S80. 13C NMR of compound 27

- HRMS of compound 27


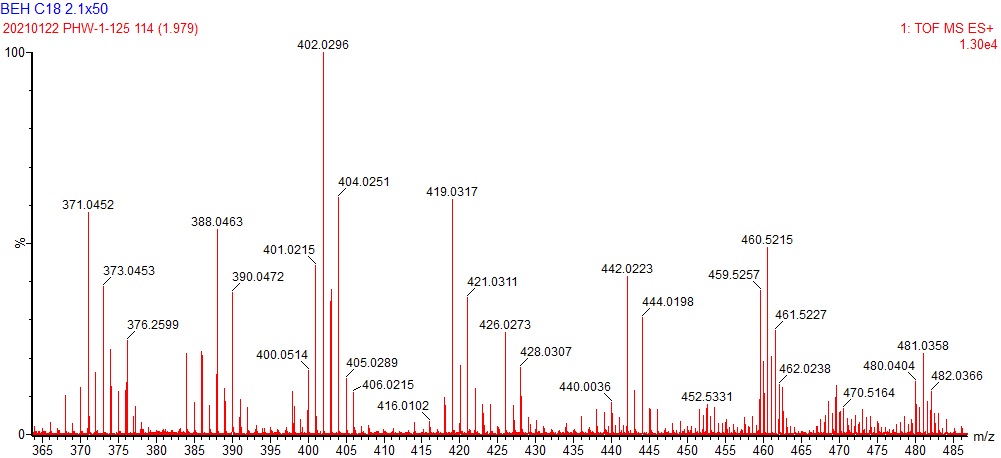


Figure S81. HRMS(ESI) of compound **27**.

- 1H-NMR-compound **28**

Figure S82. 1H NMR of compound **28**

- 13C-NMR-compound **28**

Figure S83. 13C NMR of compound 28

- HRMS of compound 28


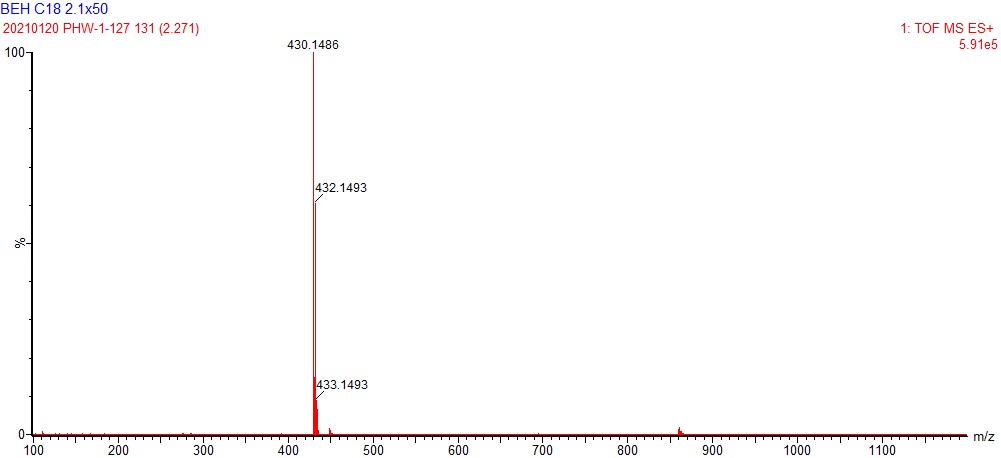


Figure S84. HRMS(ESI) of compound **28**.

- 1H-NMR-compound **29**

Figure S85. 1H NMR of compound **29**

- 13C-NMR-compound **29**

Figure S86. 13C NMR of compound 29

- HRMS of compound 29


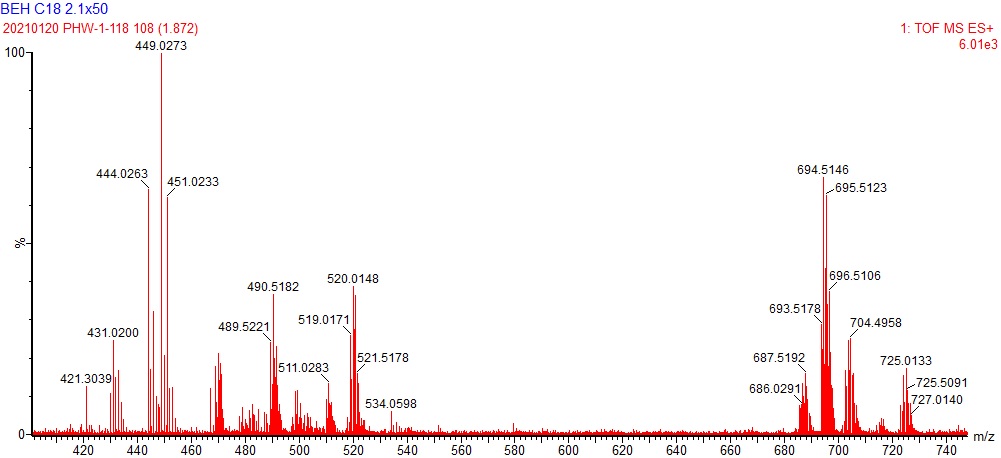
Figure S87. HRMS(ESI) of compound **29**.

- 1H-NMR-compound **30**

Figure S88. 1H NMR of compound **30**

- 13C-NMR-compound **30**

Figure S89. 13C NMR of compound 30

- HRMS of compound 30


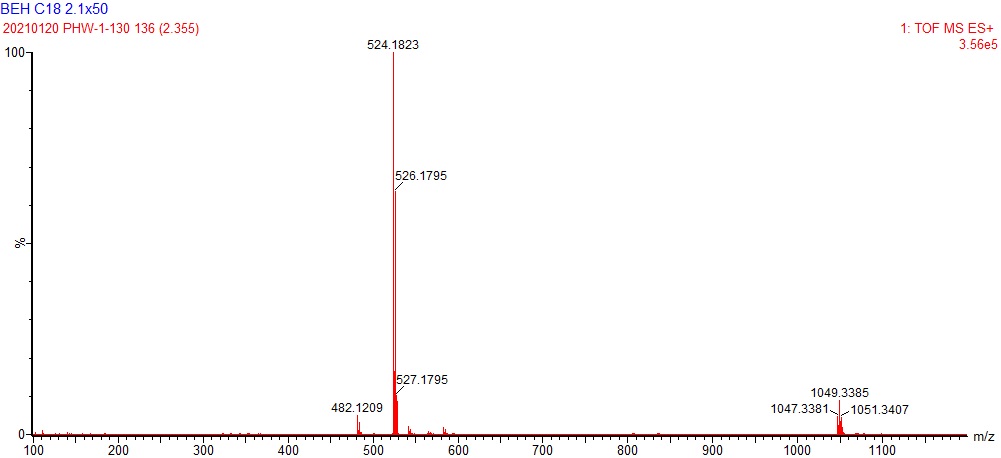
Figure S90. HRMS(ESI) of compound **30**.

- 1H-NMR-compound **31**

Figure S91. 1H NMR of compound **31**

- 13C-NMR-compound **31**

Figure S92. 13C NMR of compound 31

- HRMS of compound **3**1


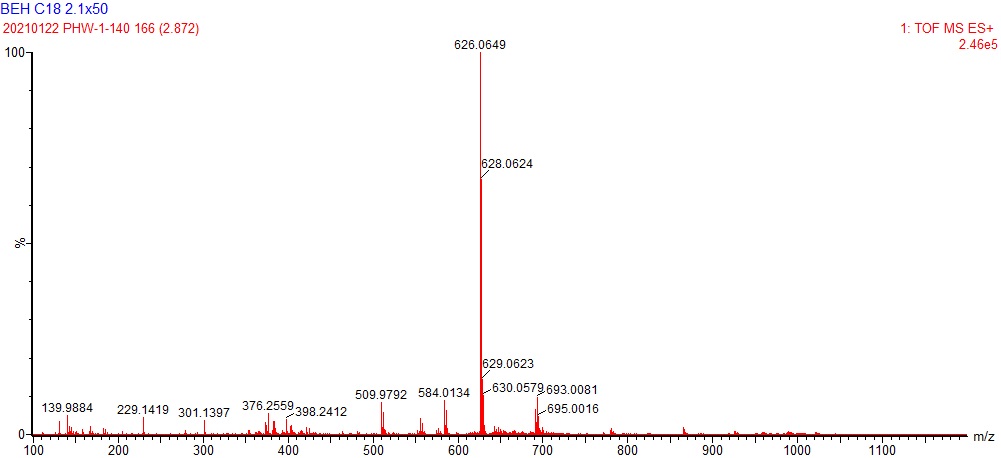
Figure S93. HRMS(ESI) of compound **31**.

- 1H-NMR-compound **32**

Figure S94. 1H NMR of compound **32**

- 13C-NMR-compound **32**

Figure S95. 13C NMR of compound 32

- HRMS of compound 32


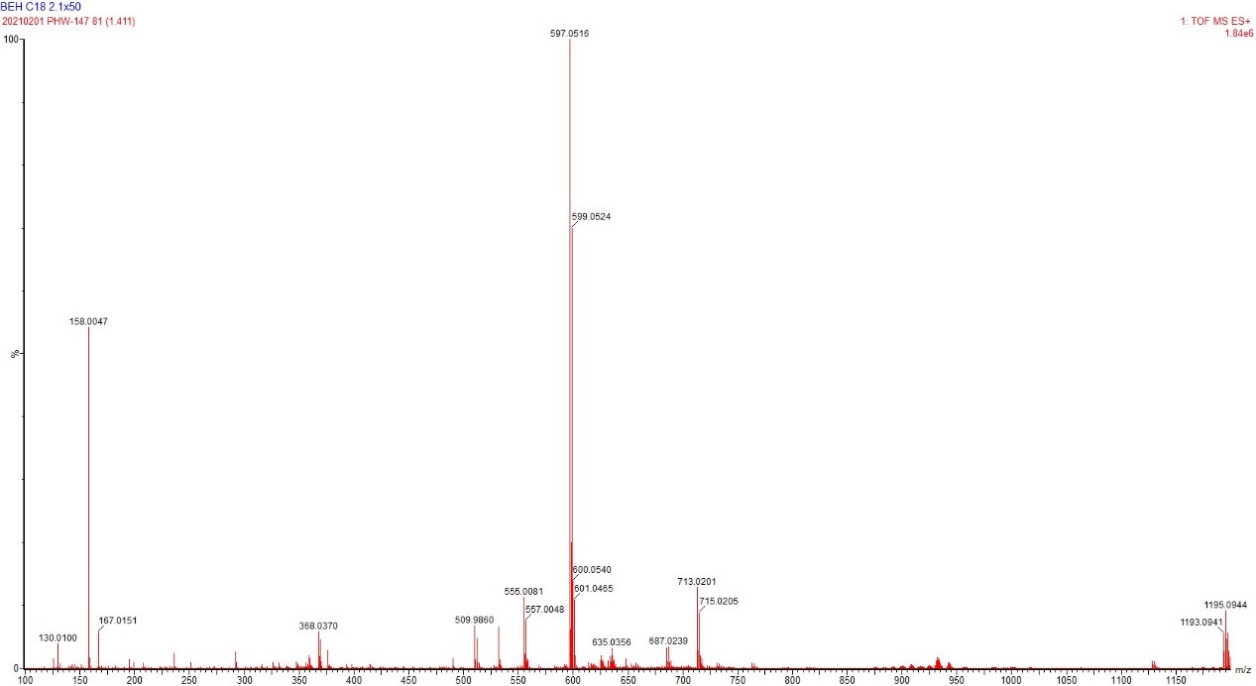
Figure S96. HRMS(ESI) of compound **32**.

**3. IC50 of compounds 30-32 on PDHK1**


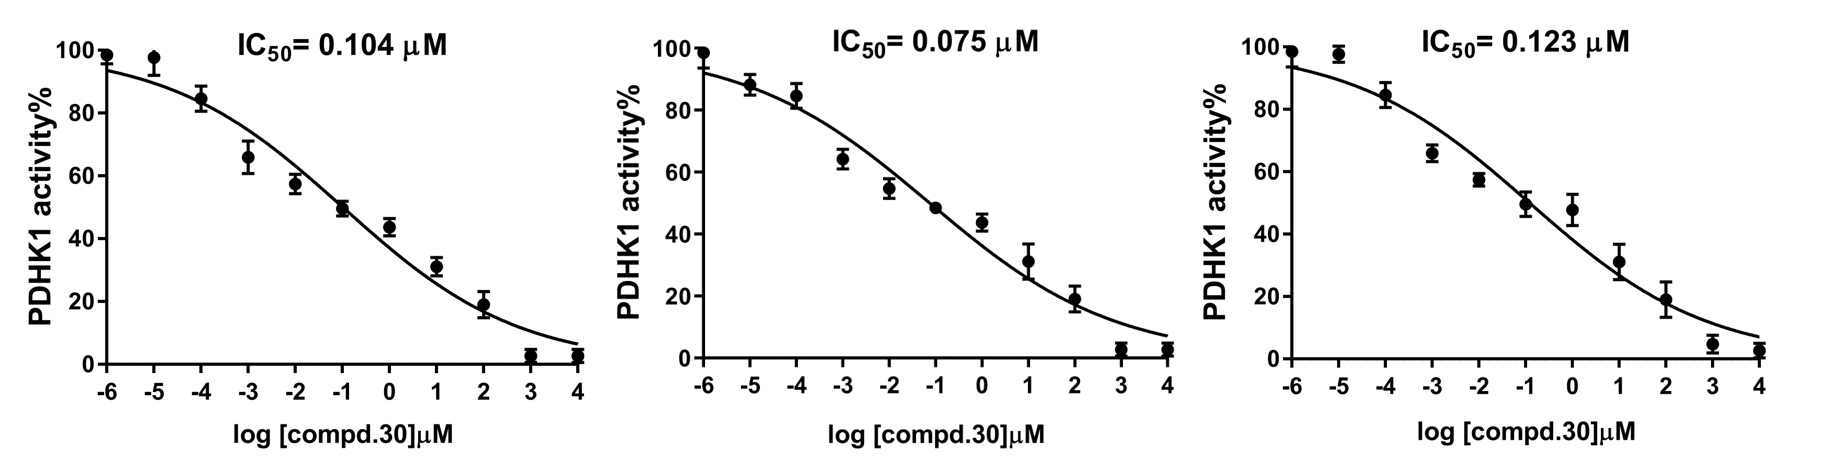


Figure S97. IC50 curves of compound **30** on PDHK1


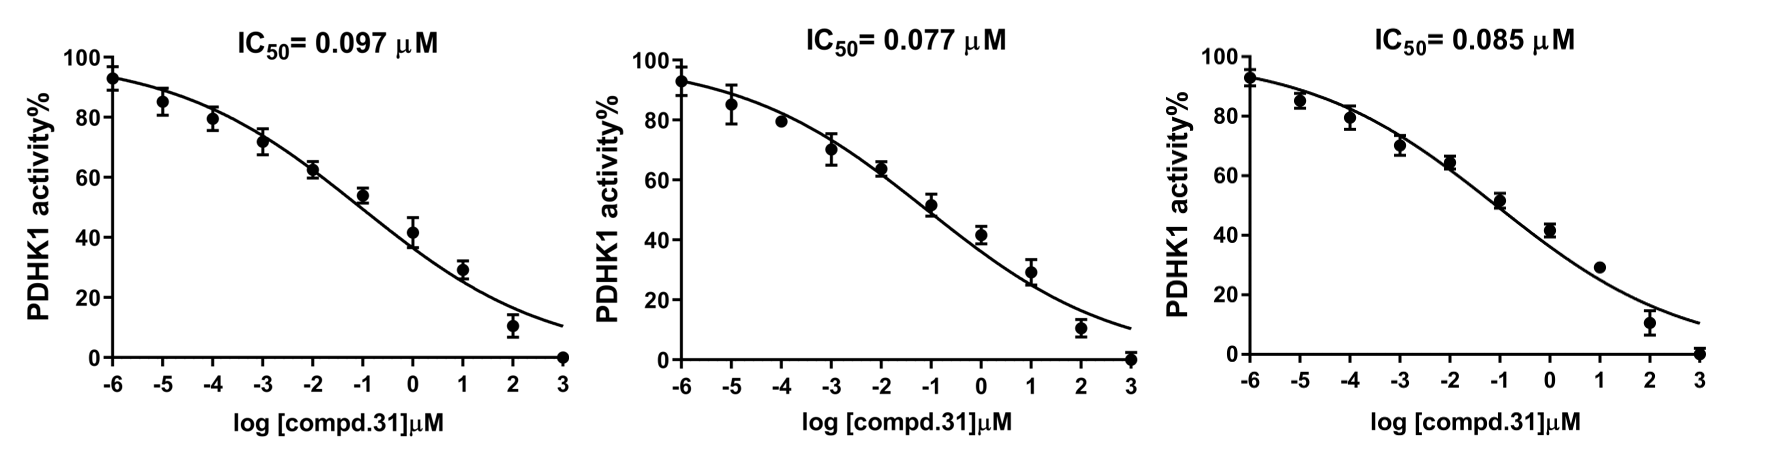


Figure S98. IC50 curves of compound **31** on PDHK1


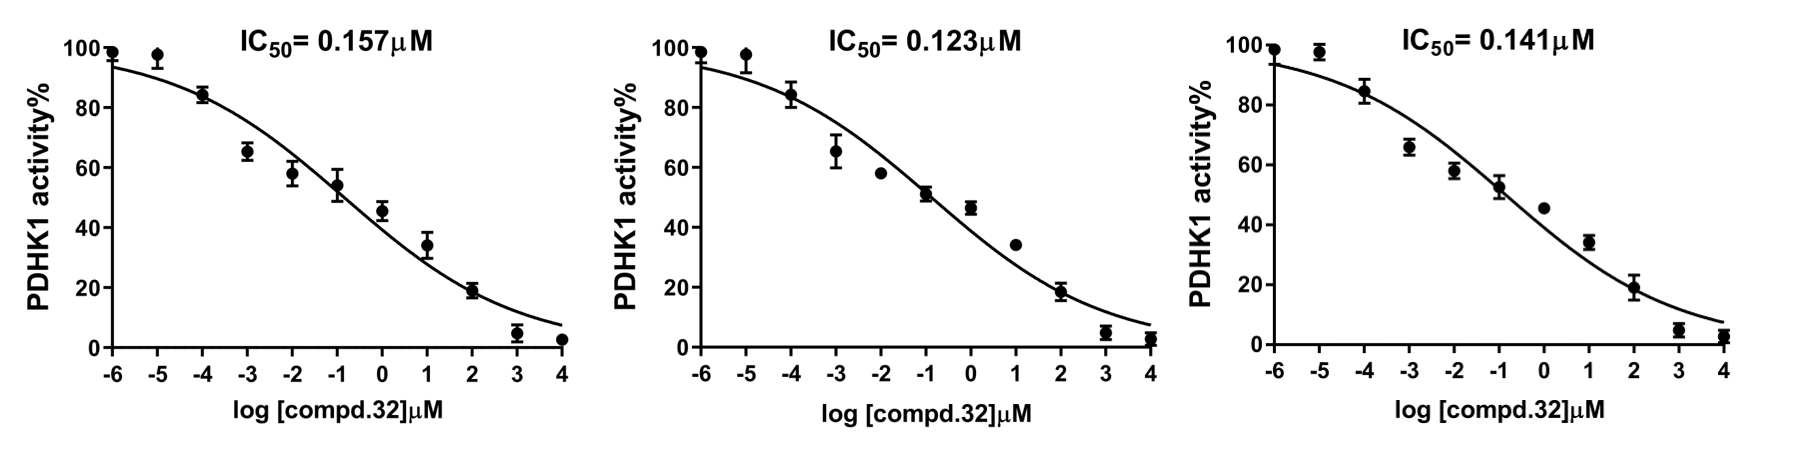


Figure S99. IC50 curves of compound **32** on PDHK1

**4. IC50 of compounds 30-32 on PDHK4**


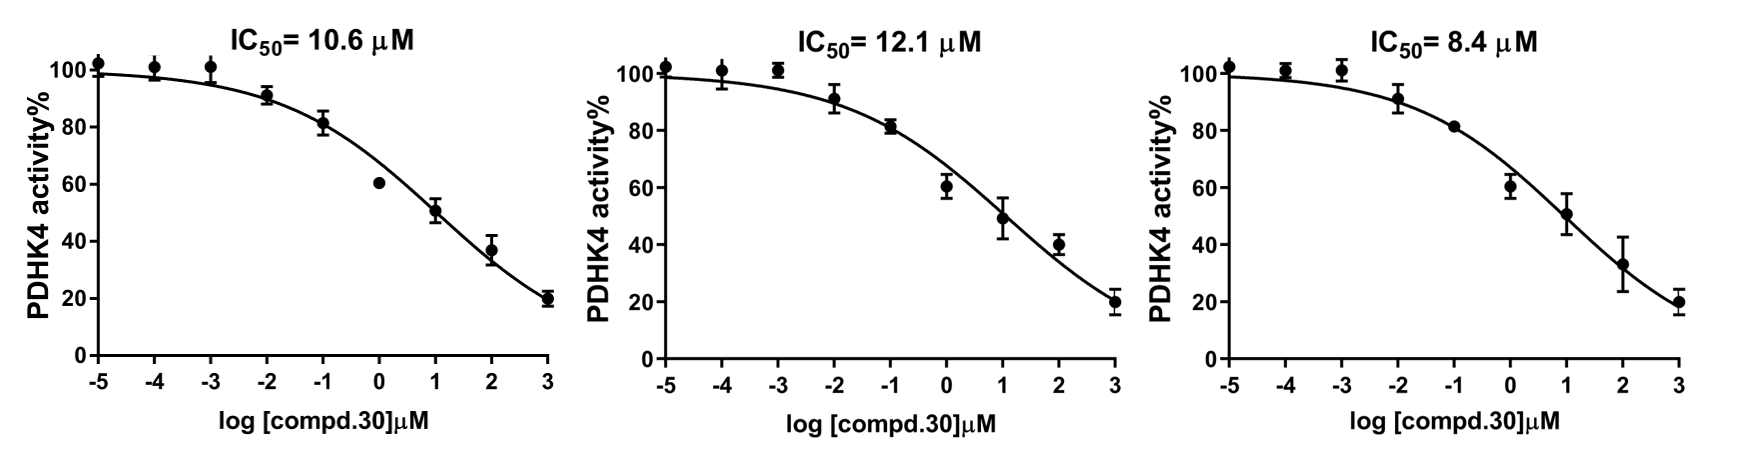


Figure S100. IC50 curves of compound **30** on PDHK4


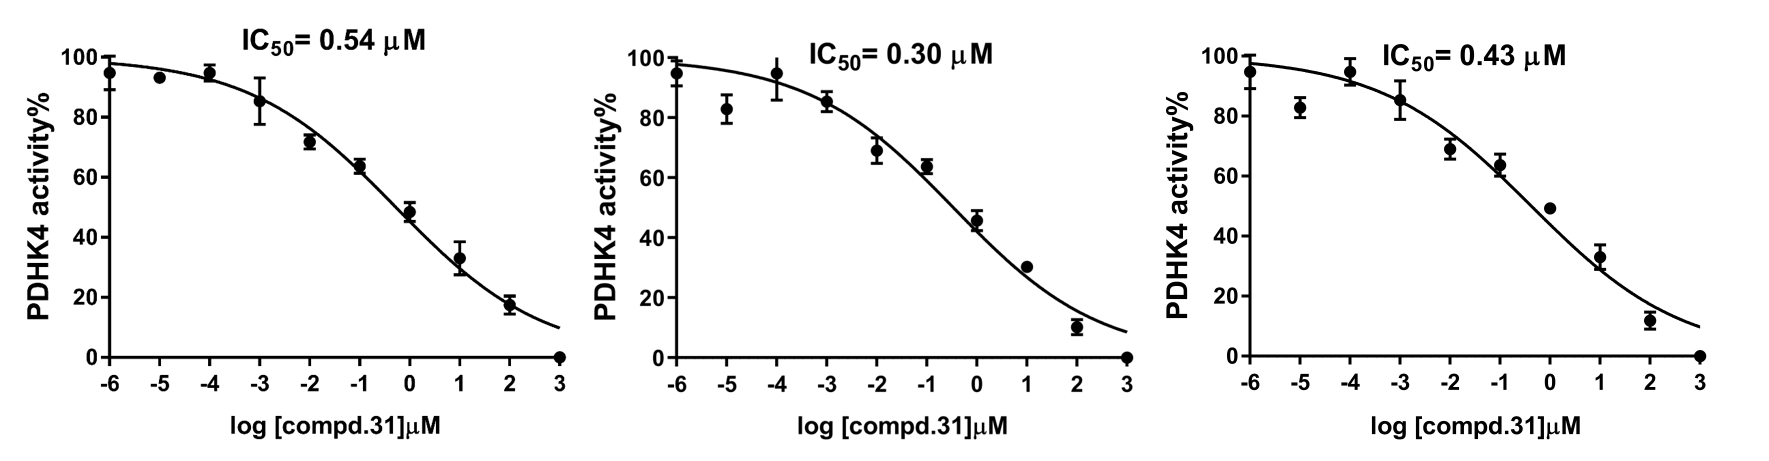


Figure S101. IC50 curves of compound **31** on PDHK4


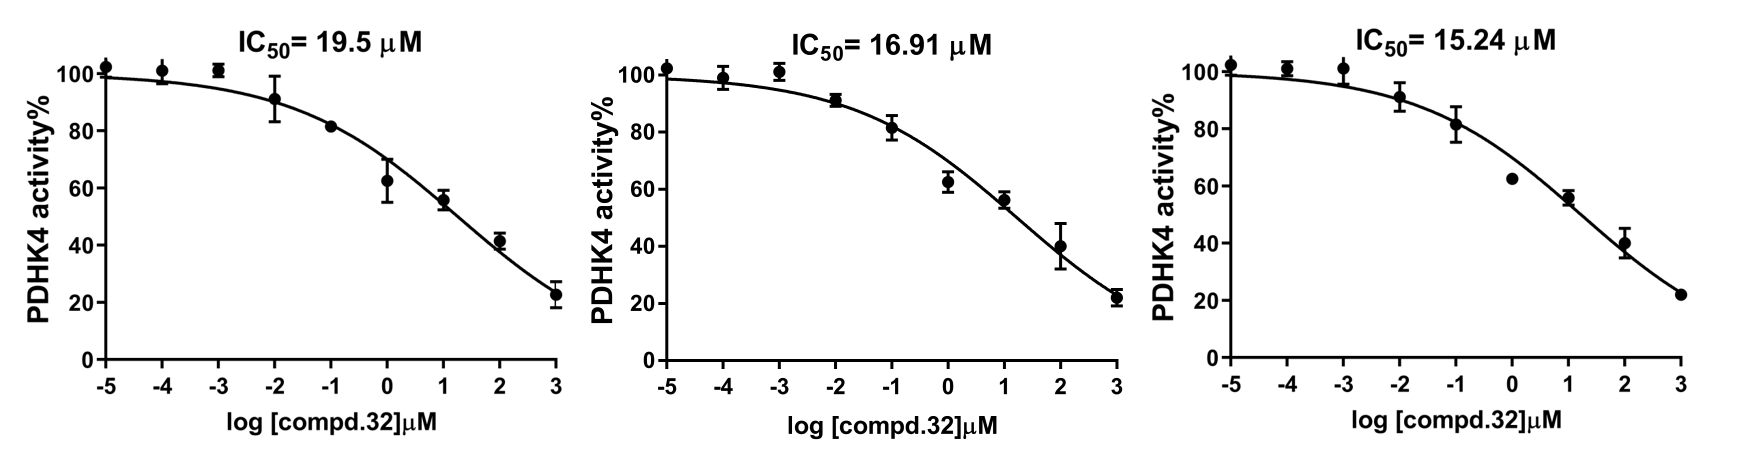


Figure S102. IC50 curves of compound **32** on PDHK4

**5. Drug-likeness properties and Predicted ADME/T profiles of compound 32**

Table S1.Physicochemical drug-likeness properties of compound **32**.

| **Compd.** | **MW***a* | **HBA***b* | **HBD***c* | **tPSA***d* (Å2) | **MlogP***e* | | **MlogS***f*（mg/L） | | **Drug**-**likeness score***g* |
| --- | --- | --- | --- | --- | --- | --- | --- | --- | --- |
| **32** | 596.04 | 9 | 2 | 131.17 | 4.11 | 16.8 | | 0.01 | |

Notes: *a*MW: molecular weight. *b*HBA: hydrogen-bond acceptors. *c*HBD: hydrogen-bond donors. *d*tPSA: topological polar surface area. *e*MlogP: calculated logarithm of the octanol-water partition coefficient. *f*MlogS: calculated water solubility. *g*The drug-likeness values calculated by Molsoft/Drug-likeness prediction tool (<http://molsoft.com/mprop/>).

Table S2. Predicted ADME/T profiles of compound **32**.

| **ADME/T profiles*** | **Compd. 32** |
| --- | --- |
| Human intestinal absorption (HIA, %) | 97.1 |
| MDCK cell permeability | 0.046 |
| P-glycoprotein (P-gp) inhibition | inhibitor |
| Plasma protein binding (%) | 94.6 |
| Blood-brain barrier penetration (BBB) | 0.20 |
| Acute algae toxicity | negative |
| *h*ERG inhibition | ambiguous |

Notes: *The values calculated at https://preadmet.bmdrc.kr
